# Supplementary material
Source: Springer Nature journal article supplement (https://www.springermedizin.de/resource/supplementary/13550_2013_173_MOESM1_ESM.pdf/9687744)

**A**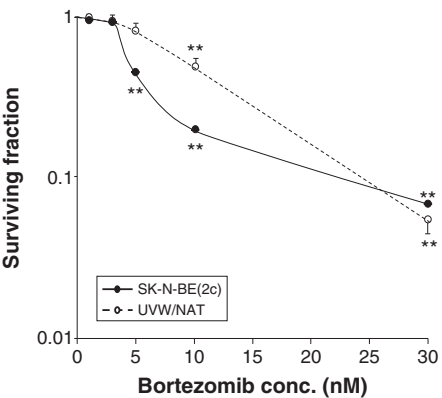**B**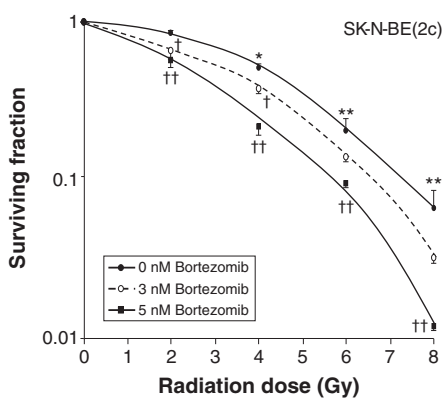**C**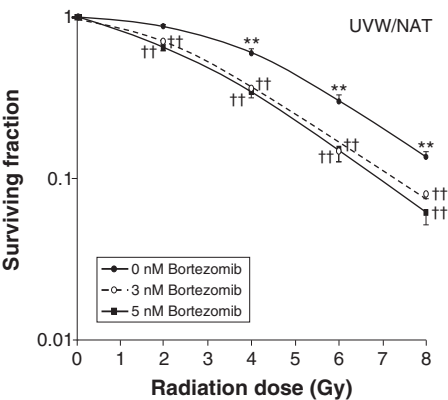

Supplement: MOESM1 [file 9687744]
